# Supplementary material
Source: Springer Nature journal article supplement (https://www.springermedizin.de/resource/supplementary/13099_2012_64_MOESM8_ESM.pdf/9665514)

***E. coli* Nissle**

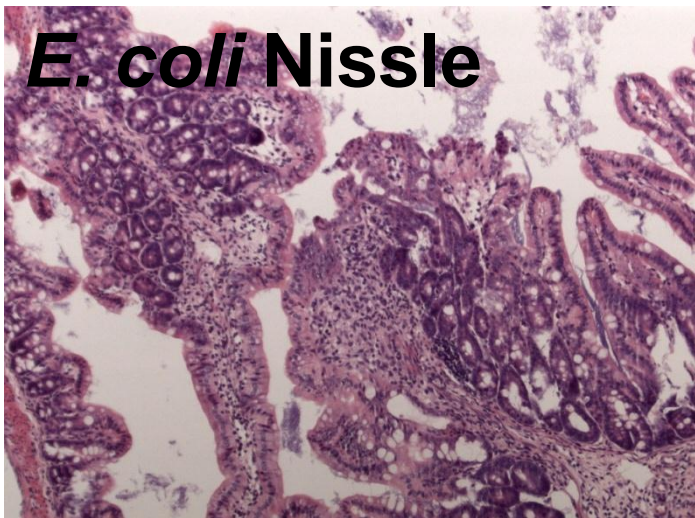

***E. coli* Nissle::*luxS***

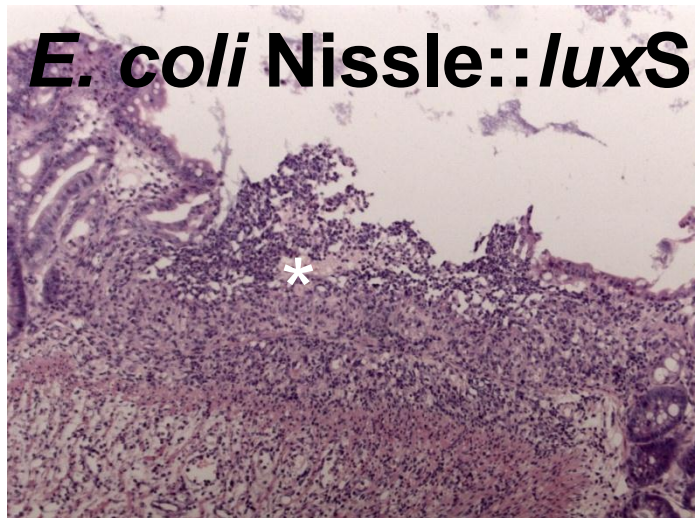

**DSS Control**

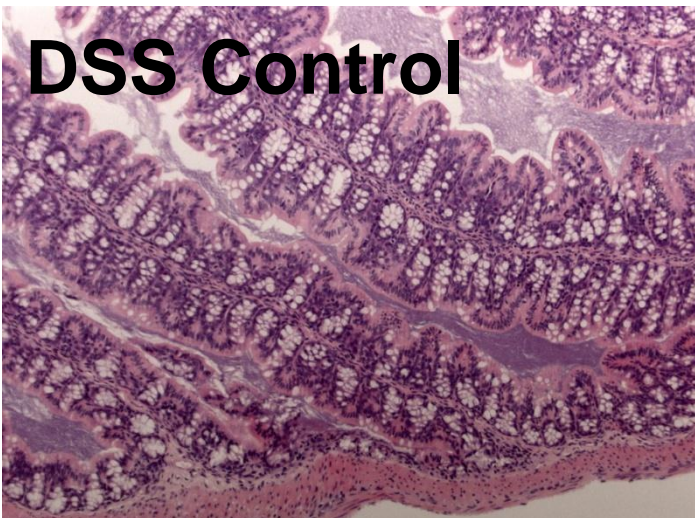

Supplement: MOESM8 [file 9665514]
